# Supplementary material
Source: bioRxiv or medRxiv preprint supplement (https://medrxiv.org/highwire/filestream/87207/field_highwire_adjunct_files/0/2020.06.24.20138024-1.pdf)

S1 Fig1. Scabies scenario.

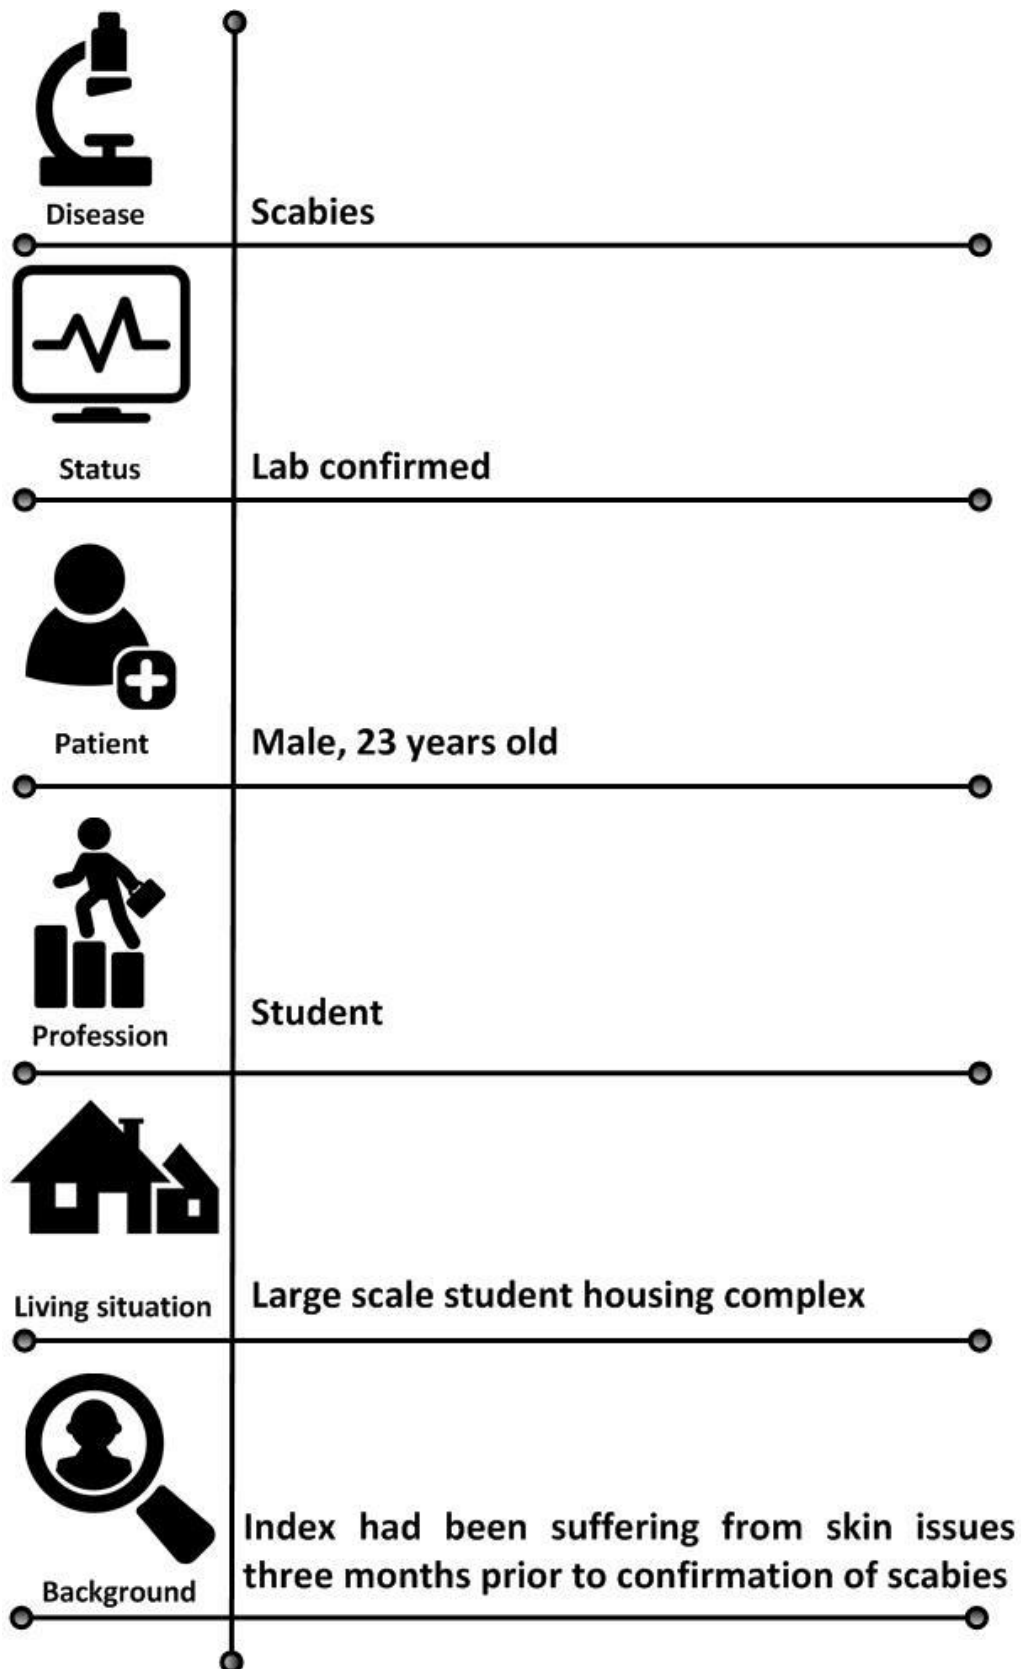

S1 Fig2. Shigella scenario

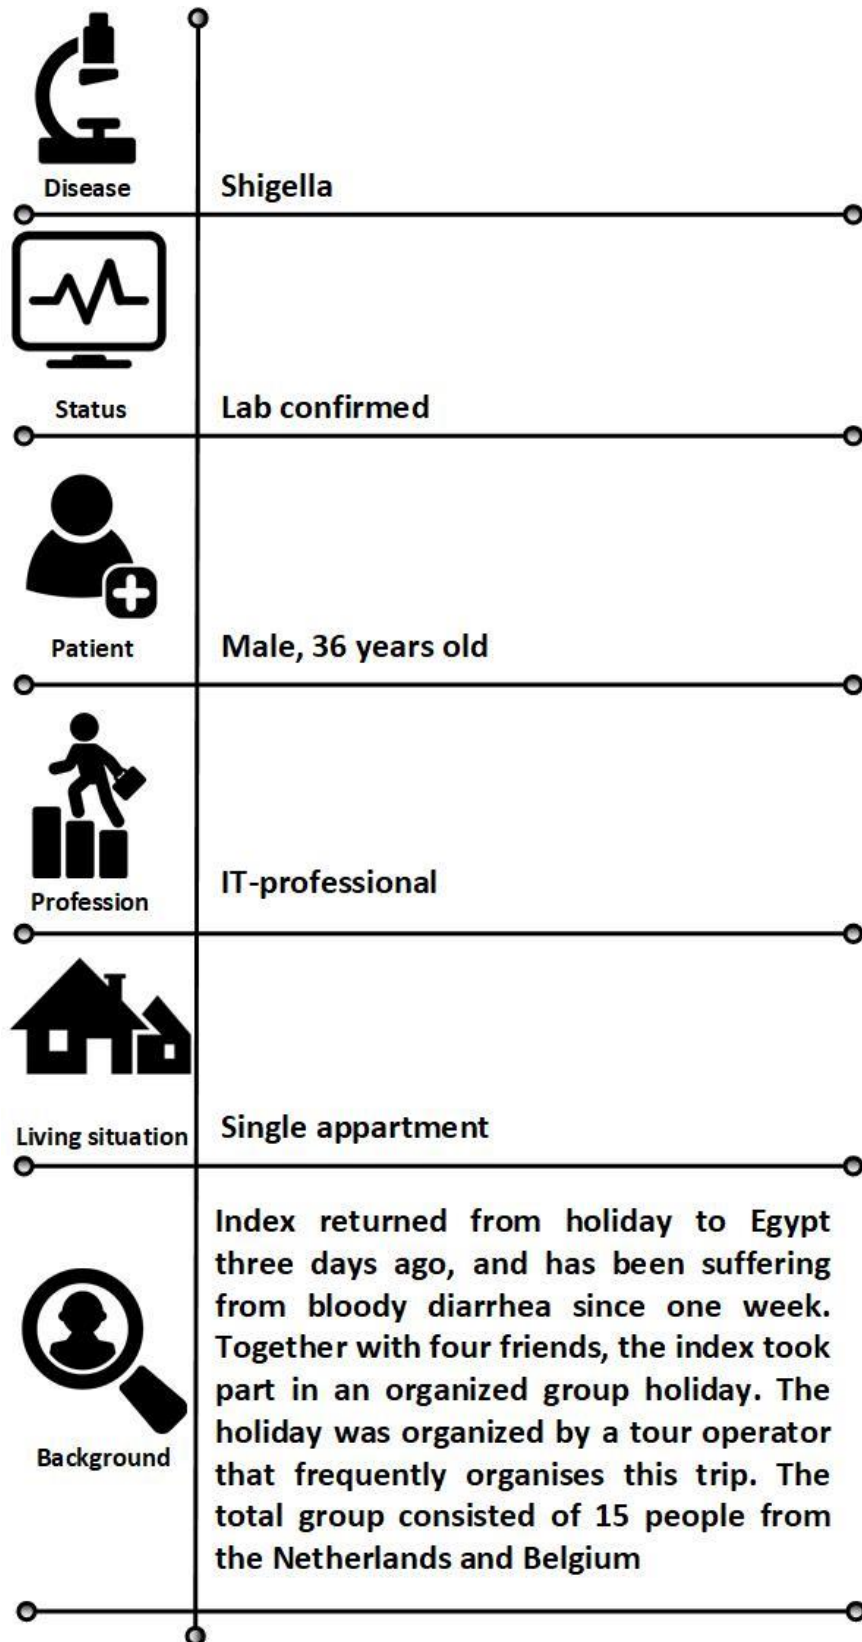

S1 Fig3. Mumps scenario

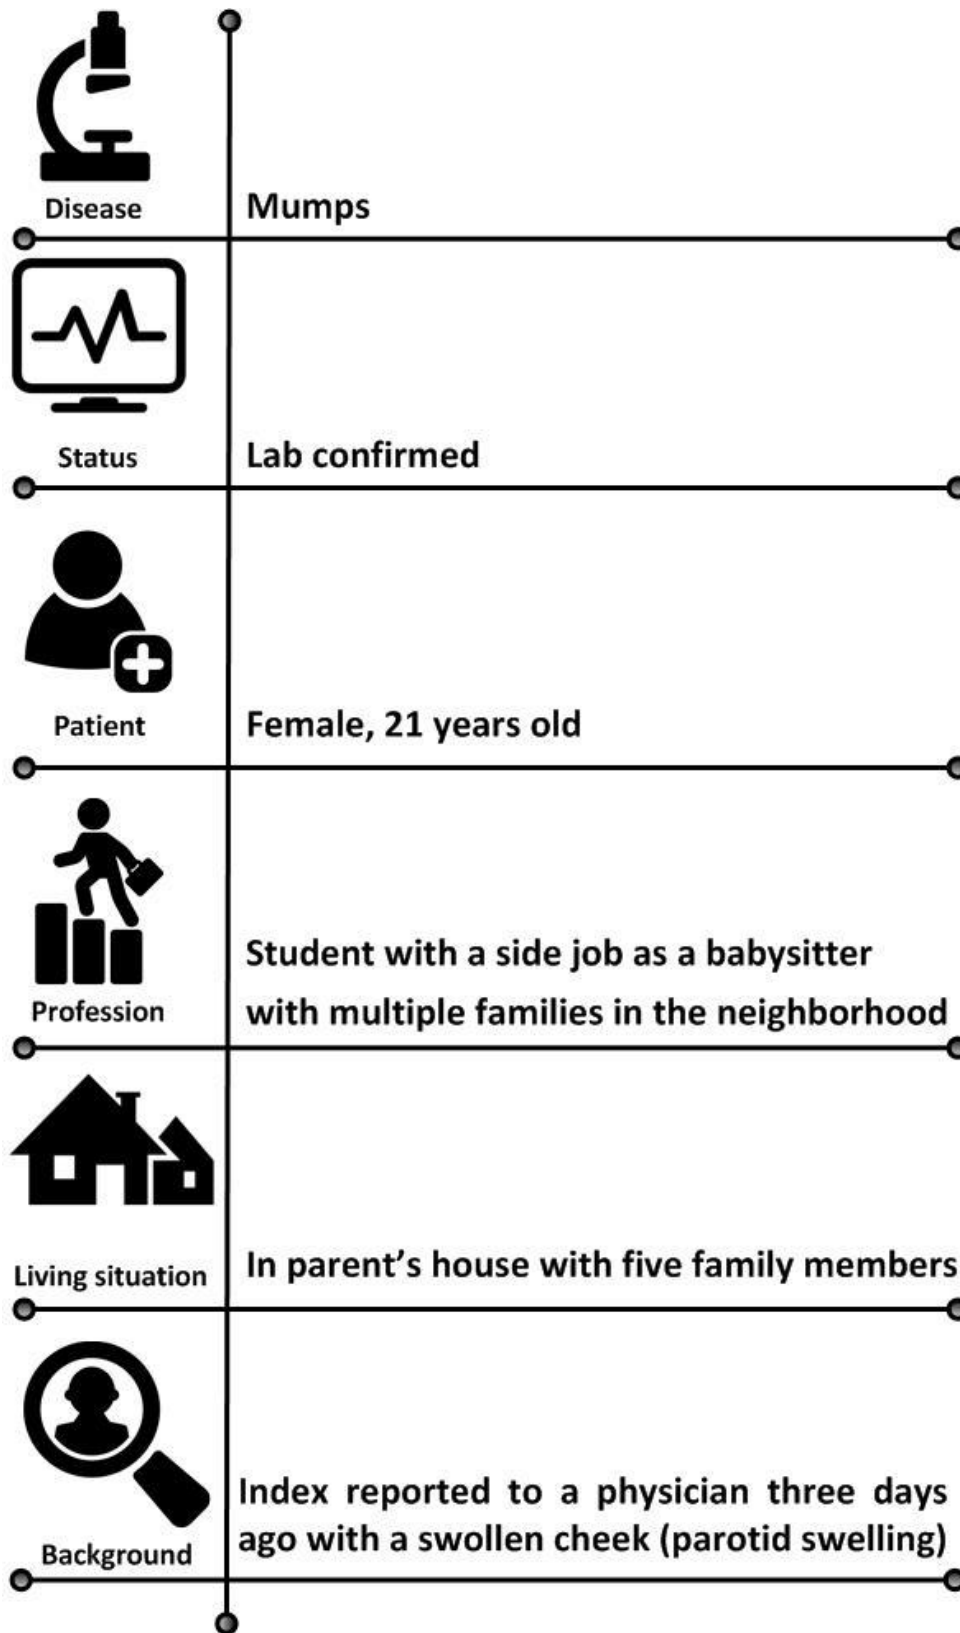

Supplement: Supplementary file [file 2020.06.24.20138024-1.pdf]
